# Supplementary material
Source: HighWire-hosted journal article supplement (https://erj.ersjournals.com/content/57/2/2000839)
Supplement: inline-supplementary-material-1 [file inline-supplementary-material-1.pdf]

Supplementary Methods:

*Materials.* Dulbecco's Modified Eagle Medium (DMEM) with and without Phenol red and Insulin-Transferrin-Selenium (ITS) were purchased from ThermoFisher Scientific (Massachusetts, United States). Phospholipids 1-palmitoyl-2-arachidonoyl-sn-glycero-3-phosphocholine (PAPC) and 1-palmitoyl-2-stearoyl-sn-glycero-3-phosphocholine (PSPC) were purchased from Avanti Polar Lipids (25mg in chloroform, Alabama, USA). PureLink RNA Mini kit was purchased from ThermoFisher Scientific for isolation of total RNA and iScript<sup>™</sup> Reverse Transcription Supermix kit purchased from Bio-Rad. Forward and reverse primers for qPCR were purchased from Integrated DNA Technologies (IDT, Iowa, United States) and suspended in TE buffer for storage at -20°C. SSoFast<sup>™</sup> EvaGreen Supermix from Bio-Rad (California, United States) was used to perform qPCR. A table of primer sequences and information can be found in table S1. COX2 antibody (#12282) and COX1 antibody (#4841) were purchased from Cell Signaling Technology (Massachusetts, United States). Protein kinase C (PKC) inhibitor GF-109203X (Cat. No. 0741) was purchased from Tocris (Bristol, United Kingdom). Cytokine analysis in cell supernatants were performed using bead-based Luminex technology (Eve Technologies, Calgary Canada) and Meso Scale Discovery (MSD, Maryland, USA) System custom U-Plex panel. Protein concentration in cell lysates was quantified using the Bio-Rad protein assay. For kinomics array, PRO-Q Phosphoprotein stain was purchased from ThermoFisher/Invitrogen.

**DE3 Study design:** Thirteen allergen-sensitized volunteers participated in the randomized, double-blinded, controlled human exposure crossover study taking place between April 2013 and April 2017 (Clinical Trials ID: NCT02017431). All participants gave written informed consent to the study protocol, which was approved by the University of British Columbia Research Ethics Board (H11-01831), Vancouver.

For inhaled allergen challenge, standardized allergenic extracts for HDM (*Dermatophagoides pteronyssinus*), Timothy grass, and Birch mix were purchased from Hollister-Stier Laboratories (Spokane, WA, USA). On two occasions separated by minimum 4-weeks washout period, participants inhaled either saline (0.9% NaCl) or diluted skin prick test allergen (HDM, grass or birch mix). 2 mL of diluted allergen or saline was delivered to participants using VixOne™ Nebulizer Mask Kit (Westmed, Tucson, AZ, USA) with flow rate of medical air set at 5 L/min for 2 minutes. The concentration of diluted allergen used for the inhalation challenge was allergen provocative concentration (PC)<sub>20</sub>, the concentration causing a 20% forced expiratory volume in one second (FEV<sub>1</sub>) fall. Allergen PC<sub>20</sub> was calculated by methacholine PC<sub>20</sub> and skin prick wheal size (1), and then was confirmed at one of the screening visits. Research participants, research coordinators, medical staff, and the study physician were blinded to allergen inhalation challenge.

2 days after allergen inhalation challenge, each participant underwent flexible bronchoscopy. Bronchoalveolar lavage (BAL) was collected by instilling and suctioning 20 mL of sterile saline (0.9% NaCl) twice and pooled them together to obtain bronchial wash (BW) and instilling and suctioning 50 mL of normal saline twice and pooled them together to obtain bronchoalveolar lavage (BAL). Both fractions were passed through a mesh filter (40 µm pore size) and centrifuged for 15 mins at 475 x g. Acellular supernatant of BW and BAL was separated, aliquoted and stored at -80 °C. For the purpose of this study, only BAL was assayed for O<sub>2</sub>PCs.

**DC Study Design:** Ten subjects (aged 22-66 years) with positive skin test responses to relevant aeroallergens (>2 mm in diameter) were recruited. All subjects had mild, stable allergic asthma with FEV<sub>1</sub> values greater than or equal to 70%, and baseline methacholine PC<sub>20</sub> of less than or equal to 16 mg/ml.. All subjects were nonsmokers, not on inhaled steroid with or without long acting inhaled β<sub>2</sub> agonist therapy and infrequently used inhaled β<sub>2</sub> agonists.

The study was a randomized, diluent-controlled, crossover design approved by the Hamilton Integrated Research Ethics Committee (Project 14-122). On day 1 subjects provided consent, completed a skin prick test, a medical history and methacholine PC20 was measured. On day 2 subjects were randomized to inhale diluent or allergen and spirometry was measured until 7h post-challenge. On day 3, 24 hours after the inhalation challenge, bronchoscopy was performed to obtain BAL fluid. This triad was repeated after a 4-week recovery period.

Airway challenges: Methacholine inhalation challenges were performed using Wright nebulizer and the tidal breathing method, as previously described (2). PC20 was calculated as the provocative concentration of methacholine inducing a 20% decrease in FEV1.

Allergen inhalation challenge was performed as previously described (3). Briefly, doubling doses of allergen extract was delivered by a Wright nebulizer and the tidal breathing method. Subjects inhaled doubling concentrations of allergen extract for 2 minutes using a nebulizer with a mouthpiece on a one-way Hans-Rudolph valve, until a greater than 20% fall in FEV1 at 10 minutes post allergen was reached. The FEV1 was then measured at 10, 20, 30, 45, 60, 90, and 120 minutes after inhalation challenge, and each hour until 7 hours after challenge. The early bronchoconstrictor response (EAR) is taken to be the largest fall in FEV1 within 2 hours after allergen inhalation, and the late response (LAR) is taken to be the largest fall in FEV1 between 3 hours and 7 hours after allergen inhalation. LAR was defined as at least 15% fall in FEV<sub>1</sub> between 3 and 7 hours after allergen challenge. Diluent challenge consisted of 3 inhalations of normal saline (0.9% NaCl) followed by spirometry for 7 hours.

Bronchoscopy: Fiberoptic bronchoscopy was performed as previously described (4) using a Pentax fiberoptic bronchoscope passed through the vocal cords and introduced into the airways and wedged into a segmental or subsegmental bronchus. BAL was collected from the right middle lobe using 3X60ml aliquots of normal saline (0.9% NaCl) introduced via the

bronchoscope and then aspirated through the bronchoscope using a closed, sterile collecting system.

*Primary cell culture.* Primary HASM cells were isolated from lung tissue obtained through lung resection surgery following approval from the Human Research Ethics Board (University of Manitoba). Subjects had no previous history of chronic lung disease (asthma/COPD) and were never smokers or had quit 30 years prior to lung resection surgery. Detailed demographics along with information about which experiments utilized which subjects are presented in the online supplement (Table S1). HASM were grown to confluence on 6-well plates in DMEM media supplemented with 5% fetal bovine serum (FBS) and 1% penicillin-streptomycin. To induced phenotype differentiation, cells were serum-deprivation in DMEM supplemented with ITS for 7 days. Cells were used between passage 4-6 for all experiments.

*Lipid Peroxidation.* 25mg of PAPC and PSPC, were oxidized in room air for 4 days and then re-suspended at a concentration of 1mg/mL in chloroform:methanol (2:1). A small sample of oxidized PAPC (OxPAPC) was tested for degree of oxidation using HPLC/electrospray ionization tandem mass spectrometry system as previously described (29684044). PSPC, which lacks fatty acid double bonds, does not undergo oxidation and therefore acts as the control lipid in these experiments. OxPAPC and PSPC were maintained in chloroform methanol at a stock concentrations of 1 mg/mL and stored under nitrogen gas at -20 °C. For exposure in cell culture, desired volumes of OxPAPC- and PSPC-containing chloroform:methanol were transferred to a falcon tube and, under nitrogen gas, the evaporated, leaving behind OxPAPC and PSPC in the tubes. Media was added to tubes containing OxPAPC and PSPC and sonicated to form liposomes prior to the addition to cells.

*Cytokine analysis.* Quantification of inflammatory mediators secreted by OxPAPC-stimulated HASM was performed on cell supernatants. Cytokines tested were GM-CSF, IFN- $\gamma$ , IL-1 $\beta$ , IL-2, IL-4, IL-5, IL-6, IL-8, IL-10, IL-12(p70), IL-13, MCP-1, and TNF- $\alpha$  (Eve Technologies). MSD custom panel with IL-6, IL-8, and GM-CSF was used to test impact of inhibitors on cytokine secretion.

*qPCR.* Isolation of total RNA from HASM for qPCR was done according to kit instructions. A total of 1ug of extracted total RNA was reverse transcribed to cDNA using manufacturer's instructions. qPCR was performed according to the SsoFast<sup>TM</sup> EvaGreen Supermix protocol on the CFX96 thermocycler (Bio-Rad) which included a melting curve.

*Western Blotting.* 10 $\mu$ g of total protein was run on a 10% SDS-PAGE gel and blotted onto nitrocellulose. Primary antibody exposure was done at 4 °C overnight at a concentration of 1:500 (COX1) and 1:750 (COX2) according to vendor specifications. Secondary anti-rabbit HRP antibody was used at a concentration of 1:3000 for both COX1 and COX2.

*Oxidized Phospholipid and Oxylipin Quantification.* Cells used for assessment of the levels of oxylipins were grown as mentioned above with the exception of phenol-free DMEM media used for supernatant collection. Analysis of oxylipin profile was conducted using high-performance liquid chromatography/tandem mass spectrometry (HPLC-MS/MS) as previously described (5). Oxidized phospholipids were measured in lipid extracts as previously described (6, 7).

Briefly, lipid extracts were reconstituted in RP eluent consisting of 60:40 acetonitrile:water, 10 mM ammonium formate and 0.1% formic acid immediately prior to injection. Thirty microlitres of the sample were injected onto an Ascentis Express C18 HPLC column (15 cm  $\times$  2.1 mm, 2.7  $\mu$ m; Supelco Analytical, Bellefonte, Pennsylvania, USA) with separation by a Prominence

UFLC system from Shimadzu Corporation (Canby, OR, USA). Elution was performed using a linear gradient of solvent A (acetonitrile/water, 60:40 v/v) and solvent B (isopropanol/acetonitrile, 90:10, v/v) with both solvents containing 10 mM ammonium formate and 0.1% formic acid. The mobile phase composition that was used is as follows: initial solvent B at 32% until 4.00 min; switched to 45% B; 5.00 min 52% B; 8.00 min 58% B; 11.00 min 66% B; 14.00 min 70% B; 18.00 min 75% B; 21.00 min 97% B; 25.00 min 97% B; and 25.10 min 32% B. A flow rate of 260  $\mu$ L/min was used for analysis, and the sample tray and column oven were held at 4°C and 45°C, respectively.

Detection of OxPL was carried out by mass spectrometry in positive polarity mode. MRM scans were performed on 6 transitions using a product ion of 184.3 m/z, corresponding to the cleaved phosphocholine moiety. Ten nanograms of internal standard 9:0-9:0 PC was added to all samples during extraction. A 4000 QTRAP® triple quadrupole mass spectrometer system with a Turbo V electrospray ion source from AB Sciex (Framingham, MA, USA) was coupled to the liquid chromatography system.

*Kinomics Array.* Following exposure of HASM to 80 $\mu$ g/mL of OxPAPC for 1, 3, or 6 hours, cell lysates were collected in a Phosphoarray lysis buffer and run on a peptide array as previously described (8). In brief, 100 $\mu$ g of protein from the cell lysates were loaded onto a peptide array in the presence of activation mixture containing 50 $\mu$ M ATP and incubated at 37°C for 2 hours.

Results were visualized using PRO-Q Diamond Phosphoprotein stain and subsequently scanned on a PowerScanner (Tecan, Morrisville, NC, USA) microarray scanner with a filter at 580 nm to detect fluorescence. Signal intensity values were collected with Array-Pro Analyzer version 6.3 software (Media Cybernetics, Rockville, MD, USA).

*Statistics.* qPCR results were analyzed using the delta-delta CT method correcting for PCR efficiency and normalized to the geometric mean of the housekeeping genes (YWHAZ, UBC,

and GAPDH). Relative abundance of cytokines and COX2 mRNA were calculated for comparison of PKC inhibitor effects. Differential phosphorylation results were calculated using the Platform for Integrated, Intelligent Kinome Analysis 2 (PIIKA2) software (9). Significantly upregulated phospho-signals at 1,3, and 6 hours were analyzed using Kinase Enrichment Analysis (KEA, (10)) to identify underlying activated kinases in the kinome data. Data was analyzed using a One-way ANOVA with a Dunnet's post-hoc comparison. Significant threshold set at  $p < 0.05$ . All results were completed in at least triplicate (3 different primary human cells). Data analysis was done in R (version 3.5.1) and graphs made using ggplot2 package (version 3.1.1).

Table S1: qPCR Primer Information.

| Gene            | NCBI<br>Accession<br>Number | Forward Primer          | Reverse Primer               |
|-----------------|-----------------------------|-------------------------|------------------------------|
| COX2<br>(PTGS2) | NM_000963.4                 | CAAATTGCTGGCAGGGTT<br>G | GGTCAATGGAAGCCTGTG<br>ATA    |
| UBC             | NM_021009.7                 | TGGCACAGCTAGTTCCGT<br>C | CACGAAGATCTGCATTGTC<br>AAGTG |

|       |                    |                           |                            |
|-------|--------------------|---------------------------|----------------------------|
| GAPDH | NM_00125679<br>9.2 | CTGACTTCAACAGCGACAC<br>C  | CGTTGTCATACCAGGAAAT<br>GAG |
| YWHAZ | NM_00113569<br>9.1 | CTTCACAAGCAGAGAGCA<br>AAG | CGACAATCCCTTTCTTGTC<br>ATC |

164

165



166     Supplementary Results:

167     Table S2: Oxylipin abundance in OxPC treated ASM cell supernatant. CYP - Cytochrome P450,

168     LOX - Lipoxygenase, COX- Cyclooxygenase. Data presented as mean  $\pm$  SD (ng/mL). \*  $p < 0.05$

169     vs. PSPC 160

170

| <u>Oxylipin</u>  | <u>Enzyme</u> | <u>NT</u>              | <u>PSPC 160</u>      | <u>Ox 20</u>           | <u>Ox 40</u>           | <u>Ox 80</u>           | <u>Ox 160</u>          |
|------------------|---------------|------------------------|----------------------|------------------------|------------------------|------------------------|------------------------|
| 11,12<br>DiHETrE | CYP           | 0.040 $\pm$<br>0.017   | 0.025 $\pm$<br>0.006 | 0.089 $\pm$<br>0.030 * | 0.103 $\pm$<br>0.031 * | 0.143 $\pm$<br>0.022 * | 0.290 $\pm$<br>0.015 * |
| 14,15<br>DiHETrE | CYP           | 0.043 $\pm$<br>0.012   | 0.039 $\pm$<br>0.003 | 0.133 $\pm$<br>0.022   | 0.186 $\pm$<br>0.054 * | 0.228 $\pm$<br>0.068 * | 0.258 $\pm$<br>0.028*  |
| 16-HETE          | CYP           | 0.056 $\pm$<br>0.037   | 0.034 $\pm$<br>0.031 | 0.052 $\pm$<br>0.027   | 0.128 $\pm$<br>0.035   | 0.068 $\pm$<br>0.018   | 0.254 $\pm$<br>0.079 * |
| 17-HETE          | CYP           | 2.393 $\pm$<br>4.145   | 0.000 $\pm$<br>0.000 | 0.000 $\pm$<br>0.000   | 0.000 $\pm$<br>0.000   | 0.000 $\pm$<br>0.000   | 4.274 $\pm$<br>7.402   |
| 18-HETE          | CYP           | 0.053 $\pm$<br>0.010   | 0.000 $\pm$<br>0.000 | 0.010 $\pm$<br>0.018   | 0.044 $\pm$<br>0.042   | 0.034 $\pm$<br>0.047   | 0.145 $\pm$<br>0.173   |
| 19-HETE          | CYP           | 5.472 $\pm$<br>1.641   | 8.505 $\pm$<br>1.407 | 6.263 $\pm$<br>0.971   | 8.222 $\pm$<br>0.684   | 7.713 $\pm$<br>0.994   | 8.450 $\pm$<br>1.750   |
| 20-COOH<br>AA    | CYP           | 0.000 $\pm$<br>0.000   | 0.078 $\pm$<br>0.135 | 0.000 $\pm$<br>0.000   | 0.000 $\pm$<br>0.000   | 0.000 $\pm$<br>0.000   | 0.321 $\pm$<br>0.556   |
| 5,6<br>DiHETrE   | CYP           | 0.008 $\pm$<br>0.014   | 0.000 $\pm$<br>0.000 | 0.000 $\pm$<br>0.000   | 0.014 $\pm$<br>0.013   | 0.000 $\pm$<br>0.000   | 0.037 $\pm$<br>0.039   |
| 8,9<br>DiHETrE   | CYP           | 0.004 $\pm$<br>0.007 * | 0.083 $\pm$<br>0.052 | 0.017 $\pm$<br>0.001 * | 0.041 $\pm$<br>0.021   | 0.022 $\pm$<br>0.007   | 0.065 $\pm$<br>0.007   |

|                        |     |                  |                  |                  |                    |                    |                     |
|------------------------|-----|------------------|------------------|------------------|--------------------|--------------------|---------------------|
| 12-Epi<br>LTB4         | LOX | 0.000 ±<br>0.000 | 0.000 ±<br>0.000 | 0.038 ±<br>0.007 | 0.094 ±<br>0.025   | 0.305 ±<br>0.062 * | 0.863 ±<br>0.192 *  |
| 12-HETE                | LOX | 0.000 ±<br>0.000 | 0.000 ±<br>0.000 | 0.026 ±<br>0.026 | 0.091 ±<br>0.036 * | 0.121 ±<br>0.027 * | 0.414 ±<br>0.029 *  |
| 14,15-LTC4<br>(EXC4)   | LOX | 0.000 ±<br>0.000 | 0.000 ±<br>0.000 | 0.000 ±<br>0.000 | 0.061 ±<br>0.055   | 0.357 ±<br>0.397   | 0.288 ±<br>0.131    |
| 15-HETE                | LOX | 0.000 ±<br>0.000 | 0.000 ±<br>0.000 | 0.162 ±<br>0.060 | 0.340 ±<br>0.013 * | 0.711 ±<br>0.058 * | 2.370 ±<br>0.153 *  |
| 15-oxoETE              | LOX | 2.212 ±<br>1.917 | 6.584 ±<br>9.975 | 3.075 ±<br>2.613 | 2.293 ±<br>2.123   | 2.132 ±<br>0.811   | 5.486 ±<br>6.068    |
| 6R-LXA4                | LOX | 0.000 ±<br>0.000 | 0.000 ±<br>0.000 | 1.456 ±<br>0.255 | 4.175 ±<br>0.366   | 7.399 ±<br>2.081   | 26.454 ±<br>9.451*  |
| 6S-LXA4                | LOX | 0.000 ±<br>0.000 | 0.000 ±<br>0.000 | 0.553 ±<br>0.062 | 1.673 ±<br>0.175   | 2.851 ±<br>0.675   | 10.648 ±<br>3.610 * |
| 6-trans<br>LTB4        | LOX | 0.000 ±<br>0.000 | 0.000 ±<br>0.000 | 0.095 ±<br>0.026 | 0.364 ±<br>0.034   | 0.860 ±<br>0.240 * | 2.445 ±<br>0.271 *  |
| 6-trans,<br>12(S) LTB4 | LOX | 0.000 ±<br>0.000 | 0.000 ±<br>0.000 | 0.058 ±<br>0.051 | 0.207 ±<br>0.033   | 0.598 ±<br>0.120 * | 1.724 ±<br>0.304 *  |
| 8,15<br>diHETE         | LOX | 0.074 ±<br>0.128 | 0.000 ±<br>0.000 | 0.000 ±<br>0.000 | 0.112 ±<br>0.194   | 0.060 ±<br>0.104   | 0.000 ±<br>0.000    |
| 8-HETE                 | LOX | 0.000 ±<br>0.000 | 0.000 ±<br>0.000 | 0.000 ±<br>0.000 | 0.000 ±<br>0.000   | 0.000 ±<br>0.000   | 0.213 ±<br>0.186 *  |
| 5,15<br>diHETE         | LOX | 0.000 ±<br>0.000 | 0.000 ±<br>0.000 | 0.043 ±<br>0.005 | 0.148 ±<br>0.005 * | 0.325 ±<br>0.021 * | 0.932 ±<br>0.053 *  |

|                                   |                     |                    |                  |                    |                    |                     |                     |
|-----------------------------------|---------------------|--------------------|------------------|--------------------|--------------------|---------------------|---------------------|
| 5-HETE                            | LOX                 | 0.037 ±<br>0.034   | 0.010 ±<br>0.017 | 0.119 ±<br>0.031   | 0.355 ±<br>0.036   | 1.231 ±<br>0.200 *  | 8.224 ±<br>0.570 *  |
| HXA3                              | LOX                 | 0.030 ±<br>0.034 * | 0.546 ±<br>0.221 | 0.201 ±<br>0.059   | 0.537 ±<br>0.323   | 0.267 ±<br>0.172    | 0.466 ±<br>0.096    |
| HXB3                              | LOX                 | 0.000 ±<br>0.000   | 0.000 ±<br>0.000 | 0.000 ±<br>0.000   | 0.000 ±<br>0.000   | 0.036 ±<br>0.062    | 0.024 ±<br>0.042    |
| LTB4                              | LOX                 | 0.000 ±<br>0.000   | 0.000 ±<br>0.000 | 0.069 ±<br>0.119   | 0.000 ±<br>0.000   | 0.287 ±<br>0.285    | 0.568 ±<br>0.530    |
| LXB4                              | LOX                 | 0.093 ±<br>0.042   | 0.101 ±<br>0.030 | 1.251 ±<br>0.319   | 1.947 ±<br>0.453   | 1.825 ±<br>0.802    | 6.102 ±<br>1.549 *  |
| Tetranor<br>12-HETE               | LOX                 | 0.055 ±<br>0.060   | 0.017 ±<br>0.029 | 0.412 ±<br>0.256   | 0.779 ±<br>0.237   | 1.232 ±<br>0.506    | 0.746 ±<br>0.376    |
| 11-HETE                           | Non-enz/<br>LOX/COX | 0.004 ±<br>0.006   | 0.000 ±<br>0.000 | 0.050 ±<br>0.002   | 0.150 ±<br>0.032   | 0.241 ±<br>0.036 *  | 1.408 ±<br>0.178 *  |
| 9-HETE                            | Non-enz/<br>LOX/COX | 0.000 ±<br>0.000   | 0.000 ±<br>0.000 | 0.000 ±<br>0.000   | 0.000 ±<br>0.000   | 0.000 ±<br>0.000    | 0.582 ±<br>0.630    |
| 2,3-dinor-8-<br>iso PGF2<br>alpha | Non-enz             | 0.040 ±<br>0.069   | 0.110 ±<br>0.123 | 0.133 ±<br>0.231   | 0.220 ±<br>0.381   | 0.339 ±<br>0.294    | 0.329 ±<br>0.323    |
| 5-iso PGF2<br>alpha VI            | Non-enz             | 0.038 ±<br>0.036   | 0.040 ±<br>0.070 | 3.630 ±<br>0.826 * | 7.291 ±<br>0.680 * | 13.893 ±<br>1.151 * | 20.738 ±<br>1.402 * |
| 8-iso 15-<br>keto PGF2<br>beta    | Non-enz             | 0.000 ±<br>0.000   | 0.000 ±<br>0.000 | 0.070 ±<br>0.067   | 0.000 ±<br>0.000   | 0.000 ±<br>0.000    | 0.000 ±<br>0.000    |

|                                     |     |                  |                  |                  |                    |                    |                     |
|-------------------------------------|-----|------------------|------------------|------------------|--------------------|--------------------|---------------------|
| 11-beta<br>Dihydroxy-<br>PGF2 alpha | COX | 0.311 ±<br>0.054 | 0.321 ±<br>0.022 | 0.722 ±<br>0.166 | 1.172 ±<br>0.500 * | 1.417 ±<br>0.081 * | 1.417 ±<br>0.211 *  |
| 11-beta<br>PGE2                     | COX | 0.181 ±<br>0.032 | 0.063 ±<br>0.110 | 4.469 ±<br>1.888 | 4.557 ±<br>2.619   | 9.595 ±<br>3.231 * | 16.978 ±<br>3.457 * |
| 11-delta<br>TXB2                    | COX | 0.149 ±<br>0.259 | 0.000 ±<br>0.000 | 0.553 ±<br>0.480 | 0.725 ±<br>0.678   | 0.597 ±<br>1.034   | 0.000 ±<br>0.000    |
| 12-HHTrE                            | COX | 0.191 ±<br>0.096 | 0.000 ±<br>0.000 | 0.554 ±<br>0.480 | 0.725 ±<br>0.678   | 0.597 ±<br>1.034   | 0.000 ±<br>0.000    |
| 15-deoxy<br>PGA2                    | COX | 1.464 ±<br>0.185 | 0.814 ±<br>0.967 | 1.581 ±<br>0.852 | 3.696 ±<br>0.907   | 6.090 ±<br>3.966   | 6.764<br>1.055 *    |
| 12-deoxy<br>PGD2                    | COX | 0.000 ±<br>0.000 | 0.000 ±<br>0.000 | 0.037 ±<br>0.036 | 0.053 ±<br>0.011   | 0.104 ±<br>0.036   | 0.223 ±<br>0.129 *  |
| 15-deoxy<br>PGJ2                    | COX | 0.042 ±<br>0.010 | 0.055 ±<br>0.041 | 0.086 ±<br>0.032 | 0.199 ±<br>0.003   | 0.152 ±<br>0.056   | 0.225 ±<br>0.123 *  |
| 12-keto<br>PGF2 alpha               | COX | 0.000 ±<br>0.000 | 0.000 ±<br>0.000 | 0.817 ±<br>0.419 | 1.103 ±<br>0.065   | 2.080 ±<br>0.231 * | 2.724 ±<br>1.214 *  |
| 15-keto<br>PGE2                     | COX | 0.160 ±<br>0.042 | 0.133 ±<br>0.029 | 0.278 ±<br>0.187 | 0.207 ±<br>0.140   | 0.236 ±<br>0.104   | 0.797 ±<br>0.307 *  |
| 19oh PGE2                           | COX | 0.505 ±<br>0.151 | 0.665 ±<br>0.139 | 0.555 ±<br>0.054 | 0.900 ±<br>0.165   | 0.850 ±<br>0.214   | 1.155 ±<br>0.637    |
| 2,3-dinor<br>11-beta<br>PGF2 alpha  | COX | 0.002 ±<br>0.004 | 0.003 ±<br>0.005 | 0.028 ±<br>0.004 | 5.166 ±<br>8.864   | 0.083 ±<br>0.023   | 0.180 ±<br>0.114    |

|                                   |     |                     |                     |                     |                     |                     |                        |
|-----------------------------------|-----|---------------------|---------------------|---------------------|---------------------|---------------------|------------------------|
| 2,3-dinor<br>TXB2                 | COX | 0.008 ±<br>0.013    | 0.000 ±<br>0.000    | 0.008 ±<br>0.013    | 0.010 ±<br>0.017    | 0.020 ±<br>0.019    | 0.038 ±<br>0.038       |
| 2,3-dinor-6<br>keto PGF1<br>alpha | COX | 0.004 ±<br>0.008    | 0.000 ±<br>0.000    | 0.000 ±<br>0.000    | 0.000 ±<br>0.000    | 0.000 ±<br>0.000    | 0.003 ±<br>0.006       |
| 6-keto<br>PGF1 alpha              | COX | 0.314 ±<br>0.122    | 0.326 ±<br>0.037    | 0.442 ±<br>0.176    | 0.272 ±<br>0.119    | 0.494 ±<br>0.156    | 0.564 ±<br>0.020       |
| 20oh PGE2                         | COX | 0.116 ±<br>0.022    | 0.142 ±<br>0.032    | 0.129 ±<br>0.027    | 0.217 ±<br>0.026    | 0.181 ±<br>0.080    | 0.253 ±<br>0.141       |
| Bicyclo<br>PGE2                   | COX | 0.000 ±<br>0.000    | 0.034 ±<br>0.069    | 0.000 ±<br>0.000    | 0.000 ±<br>0.000    | 0.000 ±<br>0.000    | 0.000 ±<br>0.000       |
| Dihydroxy<br>PGF2 alpha           | COX | 223.139 ±<br>51.046 | 209.954 ±<br>80.004 | 225.266 ±<br>54.268 | 257.601 ±<br>83.962 | 262.032 ±<br>53.537 | 234.956 ±<br>36.726    |
| Dihydroxy-<br>PGD2                | COX | 0.000 ±<br>0.000    | 0.000 ±<br>0.000    | 1.250 ±<br>0.548    | 1.644 ±<br>0.511    | 2.010 ±<br>0.634    | 2.619 ±<br>0.469       |
| Dihydroxy-<br>PGE2                | VOC | 0.000 ±<br>0.000    | 0.000 ±<br>0.000    | 2.403 ±<br>0.711    | 3.704 ±<br>1.611    | 5.176 ±<br>1.226    | 6.505 ±<br>0.939       |
| PGA2                              | COX | 0.000 ±<br>0.000    | 0.000 ±<br>0.000    | 2.008 ±<br>0.751    | 3.673 ±<br>1.351    | 9.176 ±<br>1.819    | 26.413 ±<br>11.077 *   |
| PGB2                              | COX | 0.500 ±<br>0.866    | 0.269 ±<br>0.466    | 29.719 ±<br>9.917   | 53.479 ±<br>19.729  | 141.215 ±<br>22.135 | 426.067 ±<br>161.622 * |
| PGD2                              | COX | 0.040 ±<br>0.037    | 0.020 ±<br>0.018    | 2.949 ±<br>2.037    | 4.027 ±<br>2.464    | 3.754 ±<br>3.809    | 7.132 ±<br>3.582 *     |
| PGE2                              | COX | 0.028 ±             | 0.028 ±             | 1.342 ±             | 2.043 ±             | 2.867 ±             | 4.982 ±                |

|                   |     |                  |                  |                  |                    |                    |                      |
|-------------------|-----|------------------|------------------|------------------|--------------------|--------------------|----------------------|
|                   |     | 0.024            | 0.026            | 0.470            | 0.138 *            | 0.617 *            | 1.128 *              |
| PGF2 alpha        | COX | 0.400 ±<br>0.071 | 0.448 ±<br>0.067 | 0.950 ±<br>0.204 | 1.513 ±<br>0.550 * | 2.515 ±<br>0.142 * | 3.455 ±<br>0.174 *   |
| PGJ2              | COX | 0.054 ±<br>0.051 | 0.017 ±<br>0.029 | 2.783 ±<br>0.600 | 5.220 ±<br>1.618   | 13.085 ±<br>3.006  | 37.341 ±<br>14.232 * |
| PGK2              | COX | 0.000 ±<br>0.000 | 0.000 ±<br>0.000 | 0.007 ±<br>0.012 | 0.036 ±<br>0.033   | 0.124 ±<br>0.136   | 0.124 ±<br>0.076     |
| Tetranor-<br>PGEM | COX | 1.469 ±<br>0.419 | 1.164 ±<br>0.225 | 0.936 ±<br>0.079 | 4.110 ±<br>4.514   | 1.568 ±<br>0.308   | 3.828 ±<br>2.058     |
| Tetranor-<br>PGFM | COX | 1.096 ±<br>0.722 | 0.751 ±<br>0.421 | 0.403 ±<br>0.071 | 1.799 ±<br>2.273   | 0.517 ±<br>0.064   | 0.833 ±<br>0.388     |
| TXB2              | COX | 0.000 ±<br>0.000 | 0.016 ±<br>0.028 | 0.015 ±<br>0.025 | 0.038 ±<br>0.066   | 0.000 ±<br>0.000   | 0.000 ±<br>0.000     |
| 12,13<br>diHOME   | CYP | 0.101 ±<br>0.027 | 0.088 ±<br>0.018 | 0.090 ±<br>0.010 | 0.098 ±<br>0.012   | 0.509 ±<br>0.699   | 0.112 ±<br>0.055     |
| 12,13<br>EpOME    | CYP | 0.037 ±<br>0.032 | 0.037 ±<br>0.064 | 0.014 ±<br>0.024 | 0.017 ±<br>0.029   | 0.045 ±<br>0.047   | 0.000 ±<br>0.000     |
| 13-HODE           | LOX | 0.338 ±<br>0.150 | 0.364 ±<br>0.118 | 0.480 ±<br>0.161 | 0.732 ±<br>0.312   | 0.985 ±<br>0.813   | 0.733 ±<br>0.243     |
| 13-oxoODE         | LOX | 1.002 ±<br>1.068 | 1.302 ±<br>1.362 | 0.863 ±<br>0.229 | 1.481 ±<br>0.566   | 17.041 ±<br>27.178 | 1.815 ±<br>0.793     |
| 15-oxoEDE         | LOX | 0.176 ±<br>0.305 | 0.000 ±<br>0.000 | 0.000 ±<br>0.000 | 0.000 ±<br>0.000   | 0.744 ±<br>1.289   | 0.000 ±<br>0.000     |
| 8-HEPE            | LOX | 0.000 ±          | 0.000 ±          | 0.045 ±          | 0.000 ±            | 0.000 ±            | 0.056 ±              |

|                              |         |                  |                  |                  |                    |                    |                    |
|------------------------------|---------|------------------|------------------|------------------|--------------------|--------------------|--------------------|
|                              |         | 0.000            | 0.000            | 0.039            | 0.000              | 0.000              | 0.097              |
| LXA5                         | LOX     | 0.539 ±<br>0.259 | 0.373 ±<br>0.124 | 0.829 ±<br>0.626 | 1.534 ±<br>1.452   | 2.363 ±<br>1.434   | 4.436 ±<br>2.381 * |
| 8-iso PGF3<br>alpha          | Non-enz | 2.901 ±<br>0.979 | 3.514 ±<br>0.918 | 3.212 ±<br>3.010 | 4.261 ±<br>3.354   | 2.253 ±<br>1.019   | 4.472 ±<br>1.703   |
| D17 6-keto<br>PGF-1<br>alpha | COX     | 0.000 ±<br>0.000 | 0.000 ±<br>0.000 | 0.004 ±<br>0.008 | 0.000 ±<br>0.000   | 0.000 ±<br>0.000   | 0.000 ±<br>0.000   |
| PGD3                         | COX     | 0.000 ±<br>0.000 | 0.037 ±<br>0.065 | 0.157 ±<br>0.183 | 0.224 ±<br>0.205   | 0.757 ±<br>1.312   | 0.627 ±<br>1.086   |
| TXB3                         | COX     | 3.786 ±<br>1.270 | 6.929 ±<br>2.280 | 3.336 ±<br>1.222 | 3.433 ±<br>0.322 * | 3.768 ±<br>0.214 * | 3.404 ±<br>0.056 * |
| 13-oxoOTrE                   | LOX     | 0.000 ±<br>0.000 | 0.904 ±<br>1.566 | 0.000 ±<br>0.000 | 0.000 ±<br>0.000   | 28.138 ±<br>44.669 | 2.664 ±<br>4.614   |
| 13-HOTrE                     | LOX     | 2.646 ±<br>4.582 | 5.291 ±<br>9.164 | 9.259 ±<br>1.212 | 0.000 ±<br>0.000   | 12.698 ±<br>11.252 | 26.984 ±<br>17.514 |
| 9-HOTrE                      | LOX     | 0.000 ±<br>0.000 | 0.013 ±<br>0.023 | 0.000 ±<br>0.000 | 0.000 ±<br>0.000   | 0.000 ±<br>0.000   | 0.000 ±<br>0.000   |
| 17-keto<br>DHA               | LOX     | 0.000 ±<br>0.000 | 0.000 ±<br>0.000 | 0.052 ±<br>0.090 | 0.102 ±<br>0.176   | 0.000 ±<br>0.000   | 0.000 ±<br>0.000   |
| 10S,17S-<br>DiHDoHE<br>(PDX) | LOX     | 0.010 ±<br>0.009 | 0.003 ±<br>0.006 | 0.013 ±<br>0.013 | 0.010 ±<br>0.017   | 0.018 ±<br>0.019   | 0.000 ±<br>0.000   |
| RvD2                         | LOX     | 1.000 ±          | 0.914 ±          | 0.694 ±          | 1.075 ±            | 0.669 ±            | 0.722 ±            |

|                    |                 |                  |                  |                  |                  |                    |                    |
|--------------------|-----------------|------------------|------------------|------------------|------------------|--------------------|--------------------|
|                    |                 | 0.399            | 0.389            | 0.116            | 0.356            | 0.177              | 0.235              |
| 19,20<br>DiHDoPE   | CYP             | 0.053 ±<br>0.009 | 0.079 ±<br>0.069 | 0.042 ±<br>0.009 | 0.048 ±<br>0.048 | 0.032 ±<br>0.032   | 0.079 ±<br>0.088   |
| 20HDoHE            | Non-<br>enz/CYP | 0.108 ±<br>0.188 | 0.000 ±<br>0.000 | 0.192 ±<br>0.332 | 0.000 ±<br>0.000 | 0.295 ±<br>0.511   | 0.000 ±<br>0.000   |
| 9-HODE             | LOX             | 0.326 ±<br>0.132 | 0.310 ±<br>0.134 | 0.287 ±<br>0.057 | 0.525 ±<br>0.228 | 0.614 ±<br>0.485   | 0.423 ±<br>0.159   |
| 9-oxoODE           | LOX             | 1.571 ±<br>1.235 | 1.175 ±<br>0.546 | 1.405 ±<br>0.352 | 1.646 ±<br>0.585 | 24.136 ±<br>39.195 | 1.790 ±<br>1.332   |
| 9,10,13<br>triHOME | LOX/CYP         | 0.133 ±<br>0.118 | 0.183 ±<br>0.169 | 0.114 ±<br>0.016 | 0.182 ±<br>0.051 | 1.112 ±<br>1.643   | 0.303 ±<br>0.192   |
| 9,12,13<br>triHOME | LOX/CYP         | 0.120 ±<br>0.127 | 0.209 ±<br>0.253 | 0.101 ±<br>0.087 | 0.130 ±<br>0.123 | 1.295 ±<br>1.866   | 0.286 ±<br>0.270   |
| 9,10<br>diHODE     | CYP             | 0.008 ±<br>0.007 | 0.010 ±<br>0.009 | 0.010 ±<br>0.009 | 0.002 ±<br>0.004 | 0.018 ±<br>0.005   | 0.009 ±<br>0.008   |
| 9,10<br>diHOME     | CYP             | 0.063 ±<br>0.011 | 0.055 ±<br>0.006 | 0.045 ±<br>0.018 | 0.055 ±<br>0.006 | 0.231 ±<br>0.298   | 0.067 ±<br>0.024   |
| 9,10<br>EpODE      | CYP             | 0.009 ±<br>0.008 | 0.004 ±<br>0.008 | 0.007 ±<br>0.006 | 0.000 ±<br>0.000 | 0.000 ±<br>0.000   | 0.000 ±<br>0.000   |
| 9,10<br>EpOME      | CYP             | 0.138 ±<br>0.078 | 0.066 ±<br>0.115 | 0.066 ±<br>0.114 | 0.000 ±<br>0.000 | 0.068 ±<br>0.119   | 0.000 ±<br>0.000   |
| 15-HETrE           | LOX             | 0.023 ±<br>0.010 | 0.034 ±<br>0.023 | 0.071 ±<br>0.026 | 0.134 ±<br>0.036 | 0.225 ±<br>0.058 * | 0.352 ±<br>0.062 * |
| 8-HETrE            | LOX             | 0.000 ±          | 0.000 ±          | 0.011 ±          | 0.000 ±          | 0.000 ±            | 0.000 ±            |



|                       |     |                  |                  |                  |                  |                  |                  |
|-----------------------|-----|------------------|------------------|------------------|------------------|------------------|------------------|
|                       |     | 0.000            | 0.000            | 0.020            | 0.000            | 0.000            | 0.000            |
| PGF1 alpha            | COX | 0.507 ±<br>0.018 | 0.523 ±<br>0.118 | 0.558 ±<br>0.022 | 0.601 ±<br>0.067 | 0.686 ±<br>0.074 | 0.563 ±<br>0.094 |
| TXB1                  | COX | 0.287 ±<br>0.025 | 0.267 ±<br>0.34  | 0.349 ±<br>0.102 | 0.532 ±<br>0.211 | 0.609 ±<br>0.073 | 0.638 ±<br>0.117 |
| 15-keto<br>PGF1 alpha | COX | 0.207 ±<br>0.190 | 0.219 ±<br>0.094 | 0.281 ±<br>0.052 | 0.190 ±<br>0.178 | 0.251 ±<br>0.217 | 0.193 ±<br>0.229 |
| Arachidonic<br>Acid   | NA  | 0.001 ±<br>0.001 | 0.002 ±<br>0.003 | 0.000 ±<br>0.000 | 0.001 ±<br>0.001 | 0.001 ±<br>0.001 | 0.003 ±<br>0.001 |
| DHA                   | NA  | 0.000 ±<br>0.000 | 0.000 ±<br>0.000 | 0.000 ±<br>0.000 | 0.088 ±<br>0.152 | 0.000 ±<br>0.000 | 0.000 ±<br>0.000 |
| EPA                   | NA  | 0.085 ±<br>0.022 | 0.107 ±<br>0.095 | 0.042 ±<br>0.014 | 0.041 ±<br>0.009 | 0.040 ±<br>0.014 | 0.030 ±<br>0.013 |
| 17-keto<br>DPA        | LOX | 0.003 ±<br>0.006 | 0.000 ±<br>0.000 | 0.000 ±<br>0.000 | 0.000 ±<br>0.000 | 0.000 ±<br>0.000 | 0.000 ±<br>0.000 |

171

172

### 173 References:

- 174 1. Cockcroft DW, Davis BE, Boulet L-P, Deschesnes F, Gauvreau GM, O'Byrne PM, Watson  
175 RM. The links between allergen skin test sensitivity, airway responsiveness and airway  
176 response to allergen. *Allergy* 2005;60:56–59.
- 177 2. Cockcroft DW, Killian DN, Mellon JJ, Hargreave FE. Bronchial reactivity to inhaled  
178 histamine: a method and clinical survey. *Clin Allergy* 1977;7:235–243.
- 179 3. Diamant Z, Gauvreau GM, Cockcroft DW, Boulet L-P, Sterk PJ, de Jongh FHC, Dahlén B,  
180 O'Byrne PM. Inhaled allergen bronchoprovocation tests. *J Allergy Clin Immunol*

181 2013;132:1045-1055.e6.

182 4. Collins AM, Rylance J, Wootton DG, Wright AD, Wright AKA, Fullerton DG, Gordon SB.

183 Bronchoalveolar lavage (BAL) for research; obtaining adequate sample yield. *J Vis Exp*

184 2014;doi:10.3791/4345.

185 5. Surendran A, Zhang H, Winter T, Edel A, Aukema H, Ravandi A. Oxylipin profile of human

186 low-density lipoprotein is dependent on its extent of oxidation. *Atherosclerosis*

187 2019;288:101–111.

188 6. Yeang C, Hasanally D, Que X, Hung M-Y, Stamenkovic A, Chan D, Chaudhary R,

189 Margulets V, Edel AL, Hoshijima M, Gu Y, Bradford W, Dalton N, Miu P, Cheung DY, Jassal

190 DS, Pierce GN, Peterson KL, Kirshenbaum LA, Witztum JL, Tsimikas S, Ravandi A.

191 Reduction of myocardial ischaemia-reperfusion injury by inactivating oxidized phospholipids.

192 *Cardiovasc Res* 2019;115:179–189.

193 7. Solati Z, Edel AL, Shang Y, O K, Ravandi A. Oxidized phosphatidylcholines are produced in

194 renal ischemia reperfusion injury. *PLoS ONE* 2018;13:e0195172.

195 8. Nickol ME, Ciric J, Falcinelli SD, Chertow DS, Kindrachuk J. Characterization of Host and

196 Bacterial Contributions to Lung Barrier Dysfunction Following Co-infection with 2009

197 Pandemic Influenza and Methicillin Resistant *Staphylococcus aureus*. *Viruses* 2019;11:.

198 9. Trost B, Kindrachuk J, Määttänen P, Napper S, Kusalik A. PIKA 2: an expanded, web-

199 based platform for analysis of kinome microarray data. *PLoS ONE* 2013;8:e80837.

200 10. Lachmann A, Ma'ayan A. KEA: kinase enrichment analysis. *Bioinformatics* 2009;25:684–

201 686.
